# Supplementary material
Source: Research Square preprint supplement (doi:10.21203/rs.3.rs-9020666/v1)
Supplement: Supplementary file 1 [file 07d0a342b4ce9ef0ed77e8e2.docx]

**AD任务难度感知问卷**

亲爱的同学们：

感谢您参与此次问卷调查！本问卷旨在了解大家在完成AD（audio description）任务后的感受与评价，以帮助我们更好地优化任务设计。问卷主要涉及您对整个任务过程的体验与反馈，填写大概需要3-5分钟。

请放心，所有信息将严格保密，数据将匿名处理，仅用于整体分析，您的个人隐私不会泄露。

如果您有任何疑问或需要进一步说明，请随时联系李老师：13342502550（微信同号）。

非常感谢您的支持与参与！

1. 您的被试序号是： [填空题] *

_________________________________

2. 您认为AD稿撰写的整体难度如何？ [单选题] *

请从1到5进行评分，1表示不难，5表示非常难，数字越大表示越难。

| 不难 | ○1 | ○2 | ○3 | ○4 | ○5 | 非常难 |
| --- | --- | --- | --- | --- | --- | --- |

3. 在撰写AD稿时，您认为挑选需要描述的关键视觉信息的难度有多大？ [单选题] *

请从1到5进行评分，1表示不难，5表示非常难，数字越大表示越难。

| 不难 | ○1 | ○2 | ○3 | ○4 | ○5 | 非常难 |
| --- | --- | --- | --- | --- | --- | --- |

4. 在撰写AD稿时，您认为使用合适的词来描述所挑选的视觉信息的难度有多大？ [单选题] *

请从1到5进行评分，1表示不难，5表示非常难，数字越大表示越难。

| 不难 | ○1 | ○2 | ○3 | ○4 | ○5 | 非常难 |
| --- | --- | --- | --- | --- | --- | --- |

5. 在撰写AD稿时，您认为描述场景和物体的难度有多大？ [单选题] *

请从1到5进行评分，1表示不难，5表示非常难，数字越大表示越难。

| 不难 | ○1 | ○2 | ○3 | ○4 | ○5 | 非常难 |
| --- | --- | --- | --- | --- | --- | --- |

6. 在撰写AD稿时，您认为描述角色动作的难度有多大？ [单选题] *

请从1到5进行评分，1表示不难，5表示非常难，数字越大表示越难。

| 不难 | ○1 | ○2 | ○3 | ○4 | ○5 | 非常难 |
| --- | --- | --- | --- | --- | --- | --- |

7. 在撰写AD稿时，您认为使AD稿风格与视频风格保持一致的难度有多大？ [单选题] *

请从1到5进行评分，1表示不难，5表示非常难，数字越大表示越难。

| 不难 | ○1 | ○2 | ○3 | ○4 | ○5 | 非常难 |
| --- | --- | --- | --- | --- | --- | --- |

8. 在撰写AD稿时，您认为精简AD稿语言表达的难度有多大？ [单选题] *

请从1到5进行评分，1表示不难，5表示非常难，数字越大表示越难。

| 不难 | ○1 | ○2 | ○3 | ○4 | ○5 | 非常难 |
| --- | --- | --- | --- | --- | --- | --- |

9. 在撰写AD稿时，您认为对齐时间轴并确保描述语言与画面同步的难度有多大？ [单选题] *

请从1到5进行评分，1表示不难，5表示非常难，数字越大表示越难。

| 不难 | ○1 | ○2 | ○3 | ○4 | ○5 | 非常难 |
| --- | --- | --- | --- | --- | --- | --- |

说明：以下问题请在两个任务均完成后作答。

10. 您认为英文AD稿的提供是否有助于降低中文AD稿撰写的难度？ [单选题]

| ○是 |
| --- |
| ○否 |
