# Supplementary material
Source: Research Square preprint supplement (doi:10.21203/rs.3.rs-9020666/v1)
Supplement: Supplementary file 2 [file 4b6c7975d3217c5c5d13e275.xlsx]

## Sheet: Sheet1
Part	Clip	Type	planning	drafting	revision	Overal
P029	1	ADtranslaiton	6.421	911.109	0	917.53
P029	2	direct_AD	32.433	1523.22	0	1555.66
P010	1	ADtranslaiton	95.687	1562.6	20.338	1678.62
P010	2	direct_AD	38.412	1513.09	34.221	1585.72
P022	1	ADtranslaiton	1.672	1172.56	0	1174.23
P022	2	direct_AD	37.55	1058.57	14.666	1110.78
P023	1	ADtranslaiton	43.706	1948.01	17.4	2009.11
P023	2	direct_AD	43	1187.07	8.826	1238.89
P028	1	ADtranslaiton	54.433	1871.93	77.89	2004.25
P028	2	direct_AD	48.891	2513.54	17.568	2580
P042	1	direct_AD	32.833	2008.07	3.252	2044.16
P042	2	ADtranslaiton	12.343	1087.66	47.543	1147.55
P046	1	direct_AD	16.937	2183.47	14.34	2214.75
P046	2	ADtranslaiton	46.197	1844.47	6.38	1897.05
P051	1	direct_AD	47.902	5543.46	187.54	5778.91
P051	2	ADtranslaiton	106.834	3994.3	167.429	4268.56
P053	1	direct_AD	11.447	3056.93	304.719	3373.09
P053	2	ADtranslaiton	265.723	2397.76	219.938	2883.42
P056	1	direct_AD	4.798	3314.29	529.556	3848.64
P056	2	ADtranslaiton	40.772	3141.6	1073.58	4255.95
P063	1	direct_AD	29.107	929.591	112.63	1071.33
P063	2	ADtranslaiton	77.547	1627.02	57.371	1761.94
P066	1	direct_AD	27.516	1069.14	13.752	1110.41
P066	2	ADtranslaiton	15.656	984.361	17.436	1017.45
P069	1	direct_AD	11.047	842.416	29.365	882.828
P069	2	ADtranslaiton	35.241	1041.22	11.802	1088.26
P070	1	direct_AD	24.1	1835.96	17.375	1877.44
P070	2	ADtranslaiton	75.121	1304.75	3.662	1383.53
P078	1	direct_AD	18.158	1753.57	0	1771.73
P078	2	ADtranslaiton	30.765	0	206.345	237.11
P079	1	direct_AD	24.828	1520.29	10.307	1555.42
P079	2	ADtranslaiton	41.782	1799.03	2.33	1843.14
P087	1	ADtranslaiton	68.029	2163.69	19.372	2251.09
P087	2	direct_AD	7.594	2605.99	7.651	2621.23
P090	1	ADtranslaiton	15	1660.52	6.544	1682.06
P090	2	direct_AD	16.398	1265.5	20.355	1302.25
P091	1	ADtranslaiton	6.328	613.122	6.3	625.75
P091	2	direct_AD	10.948	976.477	5.075	992.5
P094	1	ADtranslaiton	30.922	1159.63	8.56	1199.11
P094	2	direct_AD	18.515	887.72	8.14	914.375
P100	1	ADtranslaiton	16	1170	45	1231
P100	2	direct_AD	16.532	814.796	142.157	973.485
P101	1	ADtranslaiton	52.046	1391.7	15.132	1458.87
P101	2	direct_AD	24.015	1317.31	54.363	1395.69
