# Supplementary material
Source: Research Square preprint supplement (doi:10.21203/rs.3.rs-9020666/v1)
Supplement: Supplementary file 2 [file 82714d9903528f0eb8918e2d.docx]

---

title: "翻译AD和直接AD难度"

output: html_document

date: "2025-12-01"

---

```{r}

# 安装并加载所需的包

library(readxl)

library(openxlsx) # 用于保存数据到Excel

# 加载所需的库

library(readxl)

library(openxlsx) # 用于保存数据到Excel

# 读取Excel文件

direct_ad_data <- read_excel("/Users/liying/Desktop/成长/pilotAD/问卷的数据收集/直接AD难度构念.xlsx")

translation_ad_data <- read_excel("/Users/liying/Desktop/成长/pilotAD/问卷的数据收集/翻译AD难度构念测试.xls")

# 添加标识列，明确区分两个任务的数据

direct_ad_data$type <- "Direct AD"

translation_ad_data$type <- "Translation AD"

# 确保两个数据框的列名完全一致

# 检查两个数据框的列名

colnames(direct_ad_data) # 查看 Direct AD 的列名

colnames(translation_ad_data) # 查看 Translation AD 的列名

# 假设两者的变量（列）名相同，直接通过 rbind 合并

# 这里只合并“理解难度”和“操作难度”等变量，确保它们的列名一致

# 如果列名不同，可以使用 colnames() 来对列名进行统一

# 假设我们要删除两列（例如，"列A"和"列B"），你可以使用以下代码：

translation_ad_data <- translation_ad_data[, !colnames(translation_ad_data) %in% c("translation_diff", "culturalada_diff")]

# 合并两个数据框

mergedAD <- rbind(direct_ad_data, translation_ad_data)

# 查看合并后的数据

head(mergedAD)

colnames(mergedAD)

```

```{r}

library(dplyr)

# 假设merged_data是你合并后的数据框

mergedAD%>%

group_by(type) %>%

summarise(

difficulty_general_mean = mean(difficulty_general, na.rm = TRUE),

difficulty_general_sd = sd(difficulty_general, na.rm = TRUE),

style_diff_mean = mean(style_diff, na.rm = TRUE),

style_diff_sd = sd(style_diff, na.rm = TRUE),

selection_diff_mean = mean(selection_diff, na.rm = TRUE),

selection_diff_sd = sd(selection_diff, na.rm = TRUE),

diction_diff_mean = mean(diction_diff, na.rm = TRUE),

diction_diff_sd = sd(diction_diff, na.rm = TRUE),

look_diff_mean = mean(look_diff, na.rm = TRUE),

look_diff_sd = sd(look_diff, na.rm = TRUE),

scenobject_diff_mean = mean(scenobject_diff, na.rm = TRUE),

scenobject_diff_sd = sd(scenobject_diff, na.rm = TRUE),

action_diff_mean = mean(action_diff, na.rm = TRUE),

action_diff_sd = sd(action_diff, na.rm = TRUE),

condension_diff_mean = mean(condension_diff, na.rm = TRUE),

condension_diff_sd = sd(condension_diff, na.rm = TRUE),

timing_diff_mean = mean(timing_diff, na.rm = TRUE),

timing_diff_sd = sd(timing_diff, na.rm = TRUE)

)

```

```{r}

mergedAD%>%

group_by(type) %>%

summarise(

difficulty_general_mean = mean(difficulty_general, na.rm = TRUE),

difficulty_general_sd = sd(difficulty_general, na.rm = TRUE),

difficulty_general_median = median(difficulty_general, na.rm = TRUE),

style_diff_mean = mean(style_diff, na.rm = TRUE),

style_diff_sd = sd(style_diff, na.rm = TRUE),

style_diff_median = median(style_diff, na.rm = TRUE),

selection_diff_mean = mean(selection_diff, na.rm = TRUE),

selection_diff_sd = sd(selection_diff, na.rm = TRUE),

selection_diff_median = median(selection_diff, na.rm = TRUE),

diction_diff_mean = mean(diction_diff, na.rm = TRUE),

diction_diff_sd = sd(diction_diff, na.rm = TRUE),

diction_diff_median = median(diction_diff, na.rm = TRUE),

look_diff_mean = mean(look_diff, na.rm = TRUE),

look_diff_sd = sd(look_diff, na.rm = TRUE),

look_diff_median = median(look_diff, na.rm = TRUE),

scenobject_diff_mean = mean(scenobject_diff, na.rm = TRUE),

scenobject_diff_sd = sd(scenobject_diff, na.rm = TRUE),

scenobject_diff_median = median(scenobject_diff, na.rm = TRUE),

action_diff_mean = mean(action_diff, na.rm = TRUE),

action_diff_sd = sd(action_diff, na.rm = TRUE),

action_diff_median = median(action_diff, na.rm = TRUE),

condension_diff_mean = mean(condension_diff, na.rm = TRUE),

condension_diff_sd = sd(condension_diff, na.rm = TRUE),

condension_diff_median = median(condension_diff, na.rm = TRUE),

timing_diff_mean = mean(timing_diff, na.rm = TRUE),

timing_diff_sd = sd(timing_diff, na.rm = TRUE),

timing_diff_median = median(timing_diff, na.rm = TRUE)

)

```

```{r}

library(tidyverse)

# 假设你原始数据叫 mergedAD，包含列：type, difficulty_general, style_diff, ...

mergedAD_long <- mergedAD %>%

pivot_longer(

cols = starts_with("difficulty") | starts_with("style") | starts_with("selection") |

starts_with("diction") | starts_with("look") | starts_with("scenobject") |

starts_with("action") | starts_with("condension") | starts_with("timing"),

names_to = "dimension",

values_to = "score"

)

ggplot(mergedAD_long, aes(x = dimension, y = score, fill = type)) +

geom_violin(trim = FALSE, scale = "width", position = position_dodge(0.8)) +

stat_summary(fun = mean, geom = "point", shape = 23, size = 2,

position = position_dodge(0.8), color = "black", fill = "white") +

labs(x = "任务维度", y = "感知评分", fill = "任务类型") +

theme_minimal(base_size = 13) +

theme(axis.text.x = element_text(angle = 45, hjust = 1))

```

```{r}

# 假设 mergedAD_long 已经是长格式数据

ggplot(mergedAD_long, aes(x = dimension, y = score, fill = type)) +

geom_boxplot(position = position_dodge(0.8), width = 0.6, outlier.size = 1) +

stat_summary(fun = mean, geom = "point", shape = 23, size = 2,

position = position_dodge(0.8), color = "black", fill = "white") +

labs(x = "任务维度", y = "感知评分", fill = "任务类型") +

theme_minimal(base_size = 13) +

theme(axis.text.x = element_text(angle = 45, hjust = 1))

```

```{r}

library(dplyr)

# 计算每个维度的中位数，按 type 分组

mergedAD %>%

group_by(type) %>%

summarise(

difficulty_general_median = median(difficulty_general, na.rm = TRUE),

style_diff_median = median(style_diff, na.rm = TRUE),

selection_diff_median = median(selection_diff, na.rm = TRUE),

diction_diff_median = median(diction_diff, na.rm = TRUE),

look_diff_median = median(look_diff, na.rm = TRUE),

scenobject_diff_median = median(scenobject_diff, na.rm = TRUE),

action_diff_median = median(action_diff, na.rm = TRUE),

condension_diff_median = median(condension_diff, na.rm = TRUE),

timing_diff_median = median(timing_diff, na.rm = TRUE)

)

```

```{r}

# 曼-惠特尼U检验（Mann-Whitney U Test）：比较Direct AD和Translation AD在各维度上的差异

# 对每个维度使用 Wilcoxon 符号秩检验进行配对检验

# 对每个维度使用 Wilcoxon 符号秩检验进行配对检验

# 对 difficulty_general 维度进行检验

wilcox.test(mergedAD$difficulty_general[mergedAD$type == "Direct AD"],

mergedAD$difficulty_general[mergedAD$type == "Translation AD"],

paired = TRUE)

# 对 style_diff 维度进行检验

wilcox.test(mergedAD$style_diff[mergedAD$type == "Direct AD"],

mergedAD$style_diff[mergedAD$type == "Translation AD"],

paired = TRUE)

# 对 selection_diff 维度进行检验

wilcox.test(mergedAD$selection_diff[mergedAD$type == "Direct AD"],

mergedAD$selection_diff[mergedAD$type == "Translation AD"],

paired = TRUE)

# 对 diction_diff 维度进行检验

wilcox.test(mergedAD$diction_diff[mergedAD$type == "Direct AD"],

mergedAD$diction_diff[mergedAD$type == "Translation AD"],

paired = TRUE)

# 对 look_diff 维度进行检验

wilcox.test(mergedAD$look_diff[mergedAD$type == "Direct AD"],

mergedAD$look_diff[mergedAD$type == "Translation AD"],

paired = TRUE)

# 对 scenobject_diff 维度进行检验

wilcox.test(mergedAD$scenobject_diff[mergedAD$type == "Direct AD"],

mergedAD$scenobject_diff[mergedAD$type == "Translation AD"],

paired = TRUE)

# 对 action_diff 维度进行检验

wilcox.test(mergedAD$action_diff[mergedAD$type == "Direct AD"],

mergedAD$action_diff[mergedAD$type == "Translation AD"],

paired = TRUE)

# 对 condension_diff 维度进行检验

wilcox.test(mergedAD$condension_diff[mergedAD$type == "Direct AD"],

mergedAD$condension_diff[mergedAD$type == "Translation AD"],

paired = TRUE)

# 对 timing_diff 维度进行检验

wilcox.test(mergedAD$timing_diff[mergedAD$type == "Direct AD"],

mergedAD$timing_diff[mergedAD$type == "Translation AD"],

paired = TRUE)

```

```{r}

# -----------------------

# ✅（可选）导出为 CSV 文件

# write.csv(results_df, "wilcoxon_results_with_r.csv", row.names = FALSE)

# -----------------------

```

```{r}

# 加载 effsize 包

library(effsize)

# 对 difficulty_general 维度计算 Cliff's Delta

cliff.difficulty <- cliff.delta(mergedAD$difficulty_general[mergedAD$type == "Direct AD"],

mergedAD$difficulty_general[mergedAD$type == "Translation AD"])

# 对 style_diff 维度计算 Cliff's Delta

cliff.style <- cliff.delta(mergedAD$style_diff[mergedAD$type == "Direct AD"],

mergedAD$style_diff[mergedAD$type == "Translation AD"])

# 对 selection_diff 维度计算 Cliff's Delta

cliff.selection <- cliff.delta(mergedAD$selection_diff[mergedAD$type == "Direct AD"],

mergedAD$selection_diff[mergedAD$type == "Translation AD"])

# 对 diction_diff 维度计算 Cliff's Delta

cliff.diction <- cliff.delta(mergedAD$diction_diff[mergedAD$type == "Direct AD"],

mergedAD$diction_diff[mergedAD$type == "Translation AD"])

# 对 look_diff 维度计算 Cliff's Delta

cliff.look <- cliff.delta(mergedAD$look_diff[mergedAD$type == "Direct AD"],

mergedAD$look_diff[mergedAD$type == "Translation AD"])

# 对 scenobject_diff 维度计算 Cliff's Delta

cliff.scenobject <- cliff.delta(mergedAD$scenobject_diff[mergedAD$type == "Direct AD"],

mergedAD$scenobject_diff[mergedAD$type == "Translation AD"])

# 对 action_diff 维度计算 Cliff's Delta

cliff.action <- cliff.delta(mergedAD$action_diff[mergedAD$type == "Direct AD"],

mergedAD$action_diff[mergedAD$type == "Translation AD"])

# 对 condension_diff 维度计算 Cliff's Delta

cliff.condension <- cliff.delta(mergedAD$condension_diff[mergedAD$type == "Direct AD"],

mergedAD$condension_diff[mergedAD$type == "Translation AD"])

# 对 timing_diff 维度计算 Cliff's Delta

cliff.timing <- cliff.delta(mergedAD$timing_diff[mergedAD$type == "Direct AD"],

mergedAD$timing_diff[mergedAD$type == "Translation AD"])

# 查看每个维度的效应量

print(cliff.difficulty)

print(cliff.style)

print(cliff.selection)

print(cliff.diction)

print(cliff.look)

print(cliff.scenobject)

print(cliff.action)

print(cliff.condension)

print(cliff.timing)

# 使用 pwr 包进行功效分析，估算样本量是否足够

install.packages("pwr")

library(pwr)

pwr.t.test(d = 0.25, power = 0.8, type = "paired", alternative = "two.sided")

```

```{r}

# 安全数值转换函数

# 安全数值转换函数

safe_numeric <- function(x) {

if (is.factor(x)) {

return(as.numeric(as.character(x)))

} else {

return(as.numeric(x))

}

}

# 修复列提取方式

calc_wilcoxon_r <- function(varname) {

direct <- safe_numeric(mergedAD[mergedAD$type == "Direct AD", ][[varname]])

translation <- safe_numeric(mergedAD[mergedAD$type == "Translation AD", ][[varname]])

result <- wilcox.test(direct, translation, paired = TRUE, exact = FALSE, correct = TRUE)

z <- qnorm(result$p.value / 2, lower.tail = FALSE)

n <- length(direct)

r <- round(z / sqrt(n), 3)

data.frame(

Dimension = varname,

V = round(result$statistic, 2),

p = round(result$p.value, 4),

r = r

)

}

# 维度列表

dimensions <- c(

"difficulty_general", "style_diff", "selection_diff", "diction_diff",

"look_diff", "scenobject_diff", "action_diff", "condension_diff", "timing_diff"

)

# 批量计算

results_list <- lapply(dimensions, calc_wilcoxon_r)

results_df <- do.call(rbind, results_list)

# 添加显著性标记

results_df$Sig <- ifelse(results_df$p < 0.001, "***",

ifelse(results_df$p < 0.01, "**",

ifelse(results_df$p < 0.05, "*", "")))

# 打印结果

print(results_df)

```

```{r}

# 按照中位数排序每个任务类型的维度

mergedAD %>%

group_by(type) %>%

summarise(

difficulty_general_median = median(difficulty_general, na.rm = TRUE),

style_diff_median = median(style_diff, na.rm = TRUE),

selection_diff_median = median(selection_diff, na.rm = TRUE),

diction_diff_median = median(diction_diff, na.rm = TRUE),

look_diff_median = median(look_diff, na.rm = TRUE),

scenobject_diff_median = median(scenobject_diff, na.rm = TRUE),

action_diff_median = median(action_diff, na.rm = TRUE),

condension_diff_median = median(condension_diff, na.rm = TRUE),

timing_diff_median = median(timing_diff, na.rm = TRUE)

) %>%

arrange(desc(difficulty_general_median)) # 排序：从高到低

```

```{r}

library(dplyr)

# 假设 mergedAD 是你合并后的数据框

sorted_data <- mergedAD %>%

group_by(type) %>%

summarise(

difficulty_general_mean = mean(difficulty_general, na.rm = TRUE),

style_diff_mean = mean(style_diff, na.rm = TRUE),

selection_diff_mean = mean(selection_diff, na.rm = TRUE),

diction_diff_mean = mean(diction_diff, na.rm = TRUE),

look_diff_mean = mean(look_diff, na.rm = TRUE),

scenobject_diff_mean = mean(scenobject_diff, na.rm = TRUE),

action_diff_mean = mean(action_diff, na.rm = TRUE),

condension_diff_mean = mean(condension_diff, na.rm = TRUE),

timing_diff_mean = mean(timing_diff, na.rm = TRUE)

) %>%

arrange(desc(difficulty_general_mean)) # 按difficulty_general的均值从高到低排序

# 查看排序结果

print(sorted_data)

# 排序：按difficulty_general_mean从高到低

sorted_data <- sorted_data %>%

arrange(desc(difficulty_general_mean)) # 确保使用降序排序

# 查看结果

print(sorted_data)

```

```{r}

library(dplyr)

# 假设你的数据框是 mergedAD

# 计算每个任务类型（Direct AD 和 Translation AD）在不同维度上的均值

difficulty_means <- mergedAD %>%

group_by(type) %>%

summarise(

difficulty_general_mean = mean(difficulty_general, na.rm = TRUE),

style_diff_mean = mean(style_diff, na.rm = TRUE),

selection_diff_mean = mean(selection_diff, na.rm = TRUE),

diction_diff_mean = mean(diction_diff, na.rm = TRUE),

look_diff_mean = mean(look_diff, na.rm = TRUE),

scenobject_diff_mean = mean(scenobject_diff, na.rm = TRUE),

action_diff_mean = mean(action_diff, na.rm = TRUE),

condension_diff_mean = mean(condension_diff, na.rm = TRUE),

timing_diff_mean = mean(timing_diff, na.rm = TRUE)

)

# 对每个任务类型的维度均值进行降序排序

difficulty_means_sorted <- difficulty_means %>%

pivot_longer(cols = -type, names_to = "dimension", values_to = "mean_difficulty") %>%

arrange(type, desc(mean_difficulty)) # 排序：首先按任务类型，然后按均值降序排列

# 查看排序后的数据

print(difficulty_means_sorted)

```

```{r}

library(ggplot2)

# 使用条形图展示每个任务类型的维度均值

ggplot(difficulty_means_sorted, aes(x = reorder(dimension, mean_difficulty), y = mean_difficulty, fill = type)) +

geom_bar(stat = "identity", position = "dodge") +

labs(title = "Task Difficulty by Dimension", x = "Dimension", y = "Mean Difficulty") +

theme(axis.text.x = element_text(angle = 45, hjust = 1))

```
