# Supplementary material
Source: Research Square preprint supplement (doi:10.21203/rs.3.rs-9020666/v1)
Supplement: Supplementary file 3 [file 768a09adfa3203032f9d33e4.xlsx]

## Sheet: mergeAD
	Part	Type	Clip	difficulty_general	style_diff	selection_diff	diction_diff	look_diff	scenobject_diff	action_diff	condension_diff	timing_diff
1	P024	Direct	2	3	4	3	4	4	2	5	3	2
2	P056	Direct	1	4	3	5	5	4	4	5	5	4
3	P049	Direct	1	3	3	3	3	3	3	3	3	3
4	P101	Direct	2	3	3	3	3	4	4	4	3	3
5	P026	Direct	2	3	5	4	4	4	1	4	3	5
6	P100	Direct	2	3	3	3	3	3	3	3	3	3
7	P090	Direct	2	3	3	3	3	2	3	4	2	3
8	P068	Direct	2	3	3	1	2	2	2	3	4	2
9	P103	Direct	2	4	5	4	4	5	3	4	3	3
10	P079	Direct	1	3	3	3	3	3	3	3	3	3
11	P027	Direct	1	3	3	3	3	3	3	3	3	3
12	P007	Direct	2	4	4	4	3	4	3	3	3	4
13	P009	Direct	2	4	4	4	4	3	4	4	3	4
14	P016	Direct	2	3	3	2	3	3	4	4	4	4
15	P094	Direct	1	4	5	4	4	4	4	4	4	5
16	P015	Direct	2	5	5	4	4	5	5	5	4	4
17	P035	Direct	2	3	4	3	4	4	4	5	4	3
18	P021	Direct	2	4	4	3	3	3	3	4	4	4
19	P008	Direct	2	4	4	4	4	4	4	4	4	4
20	P034	Direct	2	3	4	4	4	4	4	3	3	2
21	P030	Direct	2	5	4	1	3	3	4	4	3	3
22	P029	Direct	2	5	5	5	5	5	5	5	5	5
23	P036	Direct	1	1	2	2	4	2	2	2	2	2
24	P019	Direct	2	4	4	4	3	5	5	4	3	3
25	P004	Direct	2	3	3	3	3	3	3	3	4	3
26	P063	Direct	1	3	3	3	4	4	3	4	4	4
27	P018	Direct	2	3	3	3	3	3	3	3	3	3
28	P023	Direct	2	2	4	3	3	3	3	3	3	3
29	P022	Direct	2	4	4	3	4	2	4	3	4	3
30	P031	Direct	2	4	4	4	4	4	4	5	4	4
31	P048	Direct	1	4	4	4	3	3	3	3	3	3
32	P050	Direct	2	3	3	4	4	4	4	3	3	3
33	P080	Direct	1	3	3	3	2	4	3	2	4	4
34	P042	Direct	1	4	4	4	4	4	4	4	4	4
35	P025	Direct	1	3	3	3	3	3	3	3	3	3
36	P085	Direct	1	3	3	4	4	4	3	4	4	4
37	P028	Direct	2	3	4	4	5	4	3	5	4	4
38	P046	Direct	1	4	2	3	3	3	3	3	4	3
39	P017	Direct	2	4	4	2	4	4	4	4	4	4
40	P087	Direct	2	3	4	3	4	5	5	5	4	2
41	P051	Direct	1	4	4	4	4	3	3	4	4	3
42	P020	Direct	2	3	3	2	4	4	4	4	3	3
43	P040	Direct	1	4	5	5	5	3	4	2	4	1
44	P013	Direct	2	3	2	4	4	4	4	4	4	3
45	P053	Direct	1	4	4	4	4	4	4	4	4	3
46	P058	Direct	1	4	4	3	4	4	4	3	3	3
47	P032	Direct	2	4	4	3	4	4	4	4	3	3
48	P039	Direct	1	4	4	4	3	3	3	3	4	3
49	P043	Direct	1	3	4	2	4	4	4	4	3	3
50	P051	Direct	1	3	4	4	4	3	4	3	4	3
51	P075	Direct	1	2	4	2	4	3	2	4	2	2
52	P102	Direct	2	4	4	4	4	4	4	4	4	4
53	P091	Direct	2	3	3	4	4	4	3	5	3	4
54	P104	Direct	2	4	4	3	3	4	3	4	4	4
55	P106	Direct	2	3	3	4	4	4	4	4	4	3
56	P076	Direct	1	4	4	4	4	4	4	4	4	4
57	P078	Direct	1	2	2	3	3	4	2	3	3	3
58	P082	Direct	1	4	4	3	5	5	5	4	3	4
59	P012	Direct	2	3	3	3	3	3	3	3	3	3
60	P074	Direct	1	4	4	4	4	4	4	4	4	4
61	P057	Direct	1	4	4	4	4	4	4	4	4	4
62	P024	Translation	1	2	4	4	5	4	2	5	3	2
63	P056	Translation	2	3	4	2	4	3	4	5	5	2
64	P016	Translation	1	3	4	2	4	3	3	3	4	3
65	P101	Translation	1	3	3	3	3	3	4	4	3	3
66	P049	Translation	2	2	3	3	3	3	3	3	3	3
67	P007	Translation	1	3	4	4	4	4	4	5	4	4
68	P100	Translation	1	3	3	3	3	3	3	3	3	3
69	P026	Translation	1	3	4	3	4	4	2	3	4	4
70	P090	Translation	1	3	3	3	3	3	3	4	3	3
71	P068	Translation	1	3	4	3	3	3	3	3	3	3
72	P103	Translation	1	3	5	3	3	4	3	4	4	2
73	P079	Translation	2	3	3	3	3	3	3	3	3	3
74	P027	Translation	1	3	3	3	3	3	3	3	3	3
75	P009	Translation	1	4	4	4	4	4	4	4	4	4
76	P094	Translation	2	4	5	4	4	5	4	4	4	5
77	P034	Translation	1	3	4	3	3	3	4	4	4	3
78	P080	Translation	2	4	3	3	2	4	3	2	3	4
79	P035	Translation	1	5	4	4	5	3	3	3	4	4
80	P008	Translation	1	4	4	4	4	4	4	4	4	4
81	P021	Translation	1	1	3	3	4	3	3	3	3	3
82	P029	Translation	1	5	5	5	5	5	5	5	5	5
83	P004	Translation	1	3	4	3	3	3	3	3	4	3
84	P036	Translation	2	1	2	1	2	2	2	2	3	2
85	P063	Translation	2	2	3	2	3	4	4	4	4	3
86	P019	Translation	1	4	4	4	4	4	4	4	3	4
87	P023	Translation	1	3	3	1	2	2	2	2	2	1
88	P018	Translation	1	4	4	4	4	4	4	4	4	4
89	P085	Translation	2	2	4	4	4	4	3	4	5	4
90	P022	Translation	1	3	3	3	3	4	2	3	4	3
91	P031	Translation	1	3	3	3	4	4	5	5	4	4
92	P048	Translation	2	3	2	3	3	3	3	3	3	4
93	P050	Translation	1	4	4	4	4	3	4	4	3	3
94	P042	Translation	2	4	4	4	4	4	4	4	4	4
95	P069	Translation	2	3	4	3	3	3	3	3	3	3
96	P025	Translation	2	3	3	3	3	3	3	3	3	3
97	P017	Translation	1	3	4	3	4	4	5	5	4	4
98	P046	Translation	2	3	3	4	3	3	3	3	4	4
99	P058	Translation	2	4	4	3	4	4	3	3	2	3
100	P040	Translation	2	3	4	4	4	2	4	2	3	1
101	P053	Translation	2	4	5	4	4	4	4	4	3	3
102	P028	Translation	1	2	4	2	3	3	4	4	4	3
103	P089	Translation	1	2	3	3	3	3	3	3	3	3
104	P032	Translation	1	3	3	3	4	4	4	4	3	3
105	P020	Translation	1	2	2	2	3	3	4	3	3	3
106	P039	Translation	2	3	4	4	4	4	3	4	3	3
107	P102	Translation	1	3	3	4	4	4	3	3	3	4
108	P104	Translation	1	4	4	4	4	4	4	4	4	4
109	P106	Translation	1	3	4	3	3	2	4	4	2	2
110	P076	Translation	2	3	5	4	4	3	3	3	3	3
111	P078	Translation	1	2	2	3	2	4	3	2	2	3
112	P082	Translation	2	2	3	2	4	5	4	3	2	2
113	P012	Translation	1	3	3	3	3	3	3	3	3	4
114	P074	Translation	2	4	4	4	4	4	4	4	4	4
115	P057	Translation	2	4	4	4	4	4	4	4	4	4
