# Supplementary material
Source: Research Square preprint supplement (doi:10.21203/rs.3.rs-9020666/v1)
Supplement: Supplementary file 3 [file c32420e6a9f005846cc8f3a1.docx]

---

title: "翻译和直接AD过程对比"

output: html_document

date: "2025-12-1"

---

```{r}

library(readxl)

file_path <- "/Users/liying/Desktop/研究数据.xlsx" # 文件路径

log_AD <- read_excel(file_path) # 读取 Excel 文件

log_AD1 <- na.omit(log_AD)

```

#查看type不同的level有多少个观测值

```{r}

library(dplyr)

log_AD1 %>%

group_by(Type) %>%

summarise(Count = n())

```

```{r}

library(dplyr)

# 统计每种 Type 的数据量

log_AD1 %>%

count(Type)

# 统计每个 Part 在不同 Type 下的出现次数

log_AD1_counts <- log_AD1 %>%

group_by(Part, Type) %>%

summarise(Count = n(), .groups = "drop")

# 找出只出现在 ADtranslation 但没有 direct_AD 的 Part

library(tidyverse)

extra_parts <- log_AD1_counts %>%

pivot_wider(names_from = Type, values_from = Count, values_fill = 0) %>%

filter(ADtranslaiton > direct_AD)

print(extra_parts)

log_AD2 <- log_AD1 %>%

filter(!Part %in% extra_parts$Part) # 删除多出的 Part

# 统计每种 Type 的数据量

log_AD2 %>%

count(Type)

```

```{r}

library(dplyr)

str(log_AD2)

log_AD2 <- log_AD2 %>%

mutate(

planning = as.numeric(as.character(planning)),

drafting = as.numeric(as.character(drafting)),

revision = as.numeric(as.character(revision))

)

# 计算描述统计

desc_stats <- log_AD2 %>%

group_by(Type) %>%

summarise(

planning_Mean = mean(planning, na.rm = TRUE),

planning_SD = sd(planning, na.rm = TRUE),

planning_Min = min(planning, na.rm = TRUE),

planning_Max = max(planning, na.rm = TRUE),

planning_Median = median(planning, na.rm = TRUE),

drafting_Mean = mean(drafting, na.rm = TRUE),

drafting_SD = sd(drafting, na.rm = TRUE),

drafting_Min = min(drafting, na.rm = TRUE),

drafting_Max = max(drafting, na.rm = TRUE),

drafting_Median = median(drafting, na.rm = TRUE),

revision_Mean = mean(revision, na.rm = TRUE),

revision_SD = sd(revision, na.rm = TRUE),

revision_Min = min(revision, na.rm = TRUE),

revision_Max = max(revision, na.rm = TRUE),

revision_Median = median(revision, na.rm = TRUE)

)

# 显示统计结果

print(desc_stats)

```

```{r}

log_AD2 <- log_AD2 %>%

mutate(total_time = planning + drafting + revision)

desc_stats <- log_AD2 %>%

group_by(Type) %>%

summarise(

total_Mean = mean(total_time, na.rm = TRUE),

total_SD = sd(total_time, na.rm = TRUE),

total_Min = min(total_time, na.rm = TRUE),

total_Max = max(total_time, na.rm = TRUE),

total_Median = median(total_time, na.rm = TRUE)

)

# 显示统计结果

print(desc_stats)

```

检查是否符合正态分布：

```{r}

par(mfrow = c(2, 3)) # 设置图形布局

# ADtranslaiton

qqnorm(log_AD2$planning[log_AD2$Type == "ADtranslaiton"], main = "ADtranslaiton - Planning")

qqline(log_AD2$planning[log_AD2$Type == "ADtranslaiton"], col = "red")

qqnorm(log_AD2$drafting[log_AD2$Type == "ADtranslaiton"], main = "ADtranslaiton - Drafting")

qqline(log_AD2$drafting[log_AD2$Type == "ADtranslaiton"], col = "red")

qqnorm(log_AD2$revision[log_AD2$Type == "ADtranslaiton"], main = "ADtranslaiton - Revision")

qqline(log_AD2$revision[log_AD2$Type == "ADtranslaiton"], col = "red")

# direct_AD

qqnorm(log_AD2$planning[log_AD2$Type == "direct_AD"], main = "direct_AD - Planning")

qqline(log_AD2$planning[log_AD2$Type == "direct_AD"], col = "red")

qqnorm(log_AD2$drafting[log_AD2$Type == "direct_AD"], main = "direct_AD - Drafting")

qqline(log_AD2$drafting[log_AD2$Type == "direct_AD"], col = "red")

qqnorm(log_AD2$total_time[log_AD2$Type == "direct_AD"], main = "direct_AD - Revision")

qqline(log_AD2$total_time[log_AD2$Type == "direct_AD"], col = "red")

```

```{r}

shapiro.test(log_AD2$planning[log_AD2$Type == "ADtranslaiton"])

shapiro.test(log_AD2$planning[log_AD2$Type == "direct_AD"])

shapiro.test(log_AD2$drafting[log_AD2$Type == "ADtranslaiton"])

shapiro.test(log_AD2$drafting[log_AD2$Type == "direct_AD"])

shapiro.test(log_AD2$revision[log_AD2$Type == "ADtranslaiton"])

shapiro.test(log_AD2$revision[log_AD2$Type == "direct_AD"])

shapiro.test(log_AD2$total_time[log_AD2$Type == "ADtranslaiton"])

shapiro.test(log_AD2$total_time[log_AD2$Type == "direct_AD"])

```

```{r}

library(dplyr)

library(tidyr)

# 按 Part 聚合数据，忽略 Clip

log_AD2_merged <- log_AD2 %>%

group_by(Part, Type) %>%

summarise(

planning = mean(planning, na.rm = TRUE), # 取均值，如果想用总和换成 sum()

drafting = mean(drafting, na.rm = TRUE),

revision = mean(revision, na.rm = TRUE),

.groups = "drop"

)

# 转换为宽格式，使得 ADtranslaiton 和 direct_AD 在同一行

log_AD2_wide <- log_AD2_merged %>%

pivot_wider(names_from = Type, values_from = c(planning, drafting, revision))

log_AD2_wide <- log_AD2_wide %>%

mutate(

total_time_ADtranslation = planning_ADtranslaiton + drafting_ADtranslaiton + revision_ADtranslaiton,

total_time_direct_AD = planning_direct_AD + drafting_direct_AD + revision_direct_AD

)

# 查看数据

print(log_AD2_wide)

```

```{r}

wilcox.test(log_AD2_wide$planning_ADtranslaiton, log_AD2_wide$planning_direct_AD, paired = TRUE)

wilcox.test(log_AD2_wide$drafting_ADtranslaiton, log_AD2_wide$drafting_direct_AD, paired = TRUE)

wilcox.test(log_AD2_wide$revision_ADtranslaiton, log_AD2_wide$revision_direct_AD, paired = TRUE)

wilcox.test(log_AD2_wide$total_time_ADtranslation,

log_AD2_wide$total_time_direct_AD,

paired = TRUE)

```

```{r}

# PLANNING STAGE

res_plan <- wilcox.test(log_AD2_wide$planning_ADtranslaiton,

log_AD2_wide$planning_direct_AD,

paired = TRUE, exact = FALSE, correct = FALSE)

# 获取 Z 值（用近似的正态分布计算）

Z_plan <- qnorm(res_plan$p.value / 2) * sign(res_plan$statistic - (22*23/2)) # n = 22

# 计算效应量 r

r_plan <- abs(Z_plan) / sqrt(22)

r_plan

# DRAFTING STAGE

res_draft <- wilcox.test(log_AD2_wide$drafting_ADtranslaiton,

log_AD2_wide$drafting_direct_AD,

paired = TRUE, exact = FALSE, correct = FALSE)

Z_draft <- qnorm(res_draft$p.value / 2) * sign(res_draft$statistic - (22*23/2))

r_draft <- abs(Z_draft) / sqrt(22)

r_draft

# REVISION STAGE

res_revise <- wilcox.test(log_AD2_wide$revision_ADtranslaiton,

log_AD2_wide$revision_direct_AD,

paired = TRUE, exact = FALSE, correct = FALSE)

Z_revise <- qnorm(res_revise$p.value / 2) * sign(res_revise$statistic - (22*23/2))

r_revise <- abs(Z_revise) / sqrt(22)

r_revise

# TOTAL TIME

res_total <- wilcox.test(log_AD2_wide$total_time_ADtranslation,

log_AD2_wide$total_time_direct_AD,

paired = TRUE, exact = FALSE, correct = FALSE)

# Z 变换和效应量 r 的计算

Z_total <- qnorm(res_total$p.value / 2) * sign(res_total$statistic - (22*23/2))

r_total <- abs(Z_total) / sqrt(22)

r_total

```

```{r}

library(dplyr)

# 计算总时间（Total Time）

log_AD2_wide <- log_AD2_wide %>%

mutate(

total_time_ADtranslation = planning_ADtranslaiton + drafting_ADtranslaiton + revision_ADtranslaiton,

total_time_direct_AD = planning_direct_AD + drafting_direct_AD + revision_direct_AD

)

# 查看数据

head(log_AD2_wide)

```

```{r}

wilcox.test(log_AD2_wide$total_time_ADtranslation, log_AD2_wide$total_time_direct_AD, paired = TRUE)

library(dplyr)

# 计算描述统计

total_time_stats <- log_AD2_wide %>%

summarise(

Total_Time_ADtranslation_Mean = mean(total_time_ADtranslation, na.rm = TRUE),

Total_Time_ADtranslation_SD = sd(total_time_ADtranslation, na.rm = TRUE),

Total_Time_ADtranslation_Min = min(total_time_ADtranslation, na.rm = TRUE),

Total_Time_ADtranslation_Max = max(total_time_ADtranslation, na.rm = TRUE),

Total_Time_ADtranslation_Median = median(total_time_ADtranslation, na.rm = TRUE),

Total_Time_Direct_AD_Mean = mean(total_time_direct_AD, na.rm = TRUE),

Total_Time_Direct_AD_SD = sd(total_time_direct_AD, na.rm = TRUE),

Total_Time_Direct_AD_Min = min(total_time_direct_AD, na.rm = TRUE),

Total_Time_Direct_AD_Max = max(total_time_direct_AD, na.rm = TRUE),

Total_Time_Direct_AD_Median = median(total_time_direct_AD, na.rm = TRUE)

)

# 查看结果

print(total_time_stats)

```
