# Supplementary material
Source: Research Square preprint supplement (doi:10.21203/rs.3.rs-9020666/v1)
Supplement: Supplementary file 4 [file e0df16c0b818c184ab537f9c.docx]

**Post-task Questionnaire: Perceived Difficulty of the AD Task**

### Instructions

Dear participant,

Thank you for taking part in this study. This questionnaire aims to understand your experience and perceptions after completing the audio description (AD) task. Your responses will help us better evaluate the task design and the AD production process.

The questionnaire focuses on your perceptions of the task and the difficulties you experienced during the AD writing process. It will take approximately 3–5 minutes to complete.

All responses will be treated confidentially and anonymously, and the data will be used only for research purposes.

### Scale

For Questions 2–9, please rate the perceived difficulty using the following scale:
1 = Not difficult at all
2 = Slightly difficult
3 = Moderately difficult
4 = Difficult
5 = Very difficult

### Questionnaire Items

1. Participant ID: ______________________________

2. How difficult did you find the AD task overall? (1–5)

3. When writing the AD script, how difficult was it to identify and select the key visual information that needed to be described? (1–5)

4. When writing the AD script, how difficult was it to choose appropriate words to describe the selected visual information? (1–5)

5. When writing the AD script, how difficult was it to describe scenes and objects? (1–5)

6. When writing the AD script, how difficult was it to describe the actions of characters? (1–5)

7. When writing the AD script, how difficult was it to ensure that the style of the AD matched the style of the video? (1–5)

8. When writing the AD script, how difficult was it to produce concise and economical AD descriptions? (1–5)

9. When writing the AD script, how difficult was it to align the timing and ensure that the AD narration was synchronized with the visual content? (1–5)

10. Do you think that the availability of an English AD script helped reduce the difficulty of writing the Chinese AD script? (Yes / No)
